# Supplementary material for: Photoelectrocatalytic Processes of TiO2 Film: The Dominating Factors for the Degradation of Methyl Orange and the Understanding of Mechanism
Source: MDPI journal article supplement (doi:10.3390/molecules28247967), 2023-12-06
Supplement: s1 [file s1]

# Photoelectrocatalytic Processes of TiO<sub>2</sub> Film: The Dominating Factors for the Degradation of Methyl Orange and the Understanding of Mechanism

Yuhui Xiong <sup>1,†</sup>, Sijie Ma <sup>2,†</sup>, Xiaodong Hong <sup>2</sup>, Jiapeng Long <sup>1,\*</sup> and Guangjin Wang <sup>2,\*</sup>

<sup>1</sup> School of Materials Science and Engineering, Shenyang University of Chemical Technology, Shenyang 110142, China; 2013020230@stu.syuct.edu.cn

<sup>2</sup> School of Materials Science and Hydrogen Energy, Foshan University, Foshan 528000, China; 15729508936@163.com (S.M.); hongxiaodong@fntu.edu.cn (X.H.)

\* Correspondence: long2682@126.com (J.L.); wgj501@163.com (G.W.)

† These authors contributed equally to this work

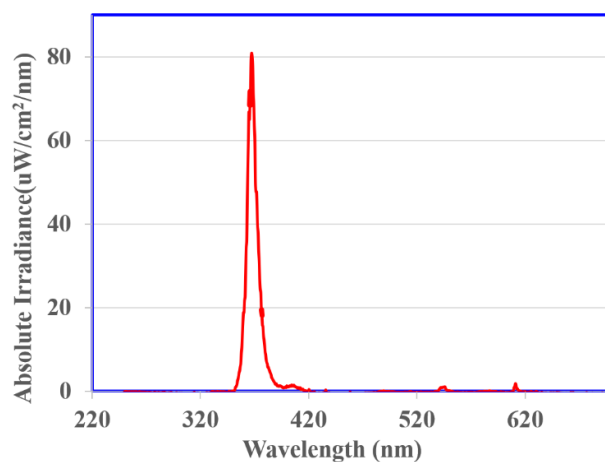

**Figure S1.** The light spectrum of the UV lamp used in irradiation experiments. The peak is located at 365 nm.

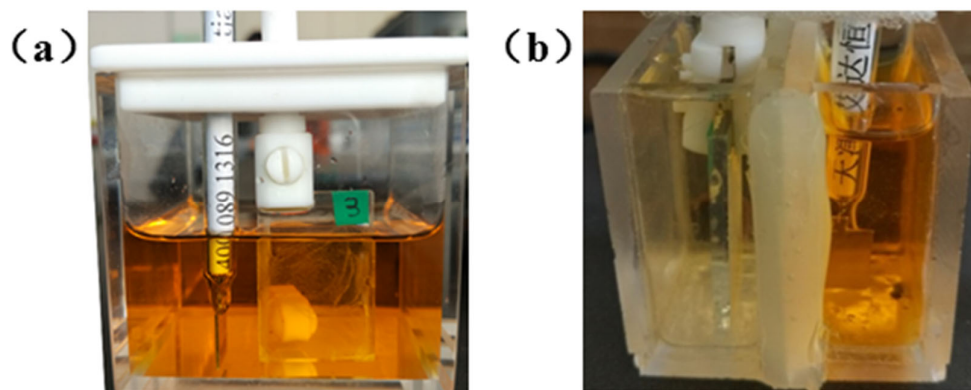

**Figure S2.** The photographs of experimental set-up of (a) PC, PEC reactors and (b) MS, PECMS reactors.

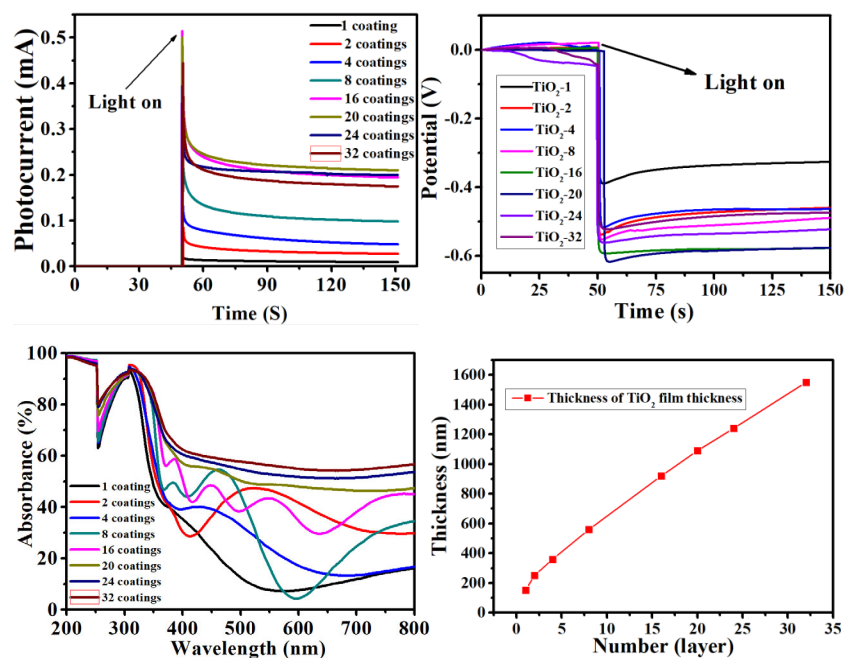

**Figure S3.** The short circuit photocurrent (a), open circuit potential (b) and (c) absorbance of TiO<sub>2</sub>-1, -2, -4, -8, -16, -20, -24 and -32. (d) variation of film thickness as the layers of coatings.

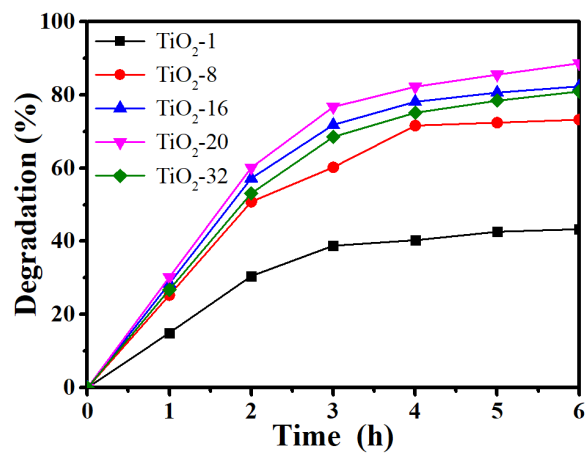

**Figure S4.** PEC degradation of MO by TiO<sub>2</sub>-1, -8, -16, -20 and 32 photoelectrodes at 1.0 V bias under UV irradiation.
